# Supplementary material
Source: MDPI journal article supplement (https://www.mdpi.com/2624-862X/3/1/11)
Supplement: s1 [file s1]

**Table S1.** Distribution of continuous variables and univariable analysis by Kruskal Wallis test.

| Outcome variable            | Independent variable         | Median (interquarter range) | <i>p</i> -value     |
|-----------------------------|------------------------------|-----------------------------|---------------------|
| <b>Bovine norovirus</b>     |                              |                             |                     |
| Pos ( <i>n</i> = 50)        | Calf age (days)              | 7 (5–12)                    | <0.001 <sup>e</sup> |
|                             | No. of calves <sup>a</sup>   | 20 (12–30)                  | <0.01               |
|                             | Calf density <sup>b</sup>    | 0.23 (0.17–0.27)            | 0.06                |
|                             | Calf mortality <sup>c</sup>  | 0 (0–1.0)                   | <0.05               |
|                             | Cow-years                    | 78 (63–110)                 | 0.10                |
|                             | Milk production <sup>d</sup> | 9300 (8943–9840)            | 0.16                |
| Neg ( <i>n</i> =200)        | Calf age (days)              | 16 (8–33)                   |                     |
|                             | No. of calves                | 14 (9–24)                   |                     |
|                             | Calf density                 | 0.20 (0.12–0.25)            |                     |
|                             | Calf mortality               | 0 (0–1.0)                   |                     |
|                             | Cow-years                    | 75 (63–94)                  |                     |
|                             | Milk production              | 9550 (8900–10000)           |                     |
| <b>Nebovirus</b>            |                              |                             |                     |
| Pos ( <i>n</i> = 13)        | Calf age (days)              | 21 (11–38)                  | 0.12                |
|                             | No. of calves                | 9 (8–24)                    | 0.35                |
|                             | Calf density                 | 0.18 (0.17–0.24)            | 0.94                |
|                             | Calf mortality               | 0 (0–1.0)                   | 0.93                |
|                             | Cow-years                    | 65 (48–99)                  | 0.20                |
|                             | Milk production              | 9350 (9300–9600)            | 0.70                |
| Neg ( <i>n</i> = 237)       | Calf age (days)              | 13 (6–27)                   |                     |
|                             | No. of calves                | 15 (9–24)                   |                     |
|                             | Calf density                 | 0.21 (0.15–0.26)            |                     |
|                             | Calf mortality               | 0 (0–1.0)                   |                     |
|                             | Cow-years                    | 75 (63–99)                  |                     |
|                             | Milk production              | 9500 (8900–10000)           |                     |
| <b>Diarrhea at sampling</b> |                              |                             |                     |
| Pos ( <i>n</i> = 36)        | Calf age (days)              | 12 (8–19)                   | 0.60                |
|                             | No. of calves                | 22 (12–28)                  | 0.05                |
|                             | Calf density                 | 0.24 (0.17–0.27)            | <0.05               |
|                             | Calf mortality               | 0 (0–1.0)                   | 0.82                |
|                             | Cow-years                    | 78 (64–100)                 | 0.32                |
|                             | Milk production              | 9200 (8600–10000)           | 0.20                |
| Neg ( <i>n</i> = 214)       | Calf age (days)              | 14 (6–30)                   |                     |
|                             | No. of calves                | 14 (9–24)                   |                     |
|                             | Calf density                 | 0.20 (0.12–0.25)            |                     |
|                             | Calf mortality               | 0 (0–1.0)                   |                     |
|                             | Cow-years                    | 75 (63–99)                  |                     |
|                             | Milk production              | 9500 (8943–10000)           |                     |

<sup>a</sup>No. of preweaned calves present at sampling, <sup>b</sup>no. of preweaned calves present at sampling /no. of cow-years, <sup>c</sup>no. of preweaned calves that died out of the last 20 born alive, <sup>d</sup>average yearly milk yield kg/cow, <sup>e</sup>comparison between pos and neg within the same variable

**Table S2.** Herd size (no. cows), no. of milkfed calves present at sampling, no. of samples from calves available from the previous study [18] and no. of samples analysed in the present study.

| Herd | No. cow-years | No. milkfed calves<br>in herd at sampling | No. samples from<br>calves available | No. samples from<br>calves analyzed |
|------|---------------|-------------------------------------------|--------------------------------------|-------------------------------------|
| 1    | 64            | 27                                        | 10                                   | 5                                   |
| 2    | 80            | 27                                        | 10                                   | 5                                   |
| 3    | 88            | 19                                        | 10                                   | 5                                   |
| 4    | 82            | 12                                        | 10                                   | 5                                   |
| 5    | 77            | 16                                        | 10                                   | 5                                   |
| 6    | 63            | 3                                         | 10                                   | 5                                   |
| 7    | 65            | 8                                         | 10                                   | 5                                   |
| 8    | 55            | 9                                         | 10                                   | 5                                   |
| 9    | 53            | 9                                         | 10                                   | 5                                   |
| 10   | 52            | 10                                        | 10                                   | 5                                   |
| 11   | 60            | 13                                        | 10                                   | 5                                   |
| 12   | 55            | 30                                        | 10                                   | 5                                   |
| 13   | 85            | 22                                        | 10                                   | 5                                   |
| 14   | 48            | 8                                         | 10                                   | 5                                   |
| 15   | 145           | 37                                        | 10                                   | 5                                   |
| 16   | 94            | 9                                         | 10                                   | 5                                   |
| 17   | 99            | 24                                        | 10                                   | 5                                   |
| 18   | 110           | 30                                        | 10                                   | 5                                   |
| 19   | 54            | 13                                        | 10                                   | 5                                   |
| 20   | 74            | 23                                        | 10                                   | 5                                   |
| 21   | 64            | 12                                        | 10                                   | 5                                   |
| 22   | 95            | 21                                        | 10                                   | 5                                   |
| 23   | 245           | 52                                        | 10                                   | 5                                   |
| 24   | 50            | 8                                         | 10                                   | 5                                   |
| 25   | 93            | 24                                        | 10                                   | 5                                   |
| 26   | 54            | 9                                         | 10                                   | 5                                   |
| 27   | 120           | 32                                        | 10                                   | 5                                   |
| 28   | 70            | 12                                        | 10                                   | 5                                   |

|    |     |    |    |   |
|----|-----|----|----|---|
| 29 | 100 | 11 | 10 | 5 |
| 30 | 65  | 2  | 10 | 5 |
| 31 | 60  | 6  | 10 | 5 |
| 32 | 63  | 13 | 10 | 5 |
| 33 | 63  | 16 | 10 | 5 |
| 34 | 78  | 8  | 10 | 5 |
| 35 | 64  | 15 | 10 | 5 |
| 36 | 68  | 8  | 10 | 5 |
| 37 | 75  | 9  | 10 | 5 |
| 38 | 111 | 30 | 10 | 5 |
| 39 | 80  | 17 | 10 | 5 |
| 40 | 50  | 9  | 10 | 5 |
| 41 | 100 | 24 | 10 | 5 |
| 42 | 70  | 6  | 10 | 5 |
| 43 | 90  | 25 | 10 | 5 |
| 44 | 120 | 30 | 10 | 5 |
| 45 | 75  | 22 | 10 | 5 |
| 46 | 75  | 15 | 10 | 5 |
| 47 | 120 | 14 | 10 | 5 |
| 48 | 135 | 14 | 10 | 5 |
| 49 | 100 | 27 | 10 | 5 |
| 50 | 180 | 33 | 10 | 5 |
